# Supplementary material for: Differential Glucose-Regulation of MicroRNAs in Pancreatic Islets of Non-Obese Type 2 Diabetes Model Goto-Kakizaki Rat
Source: PubMed Central journal article supplement (PMC3072418; doi:10.1371/journal.pone.0018613), 2011-04-07

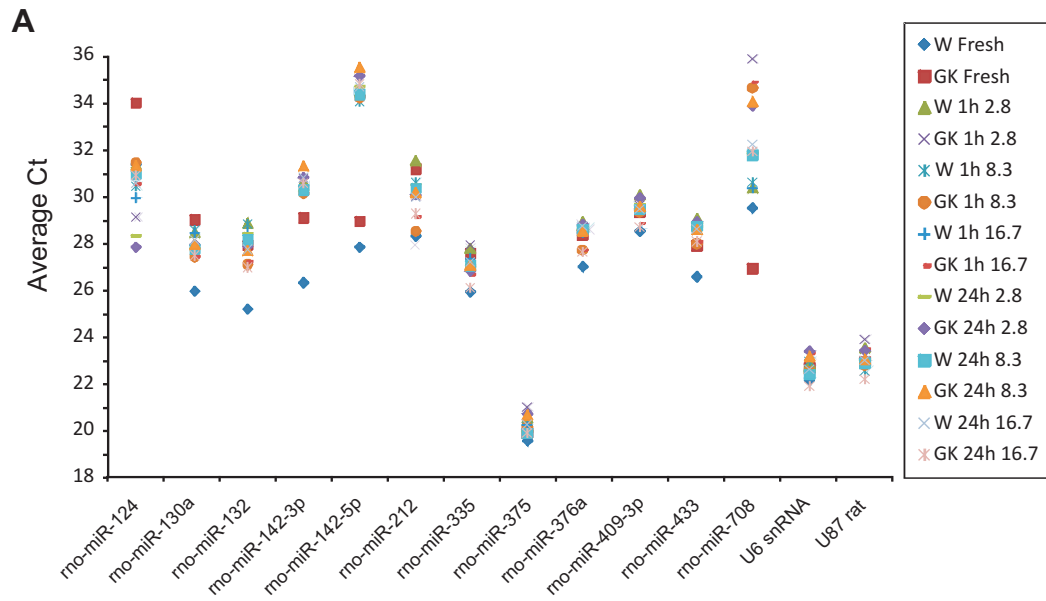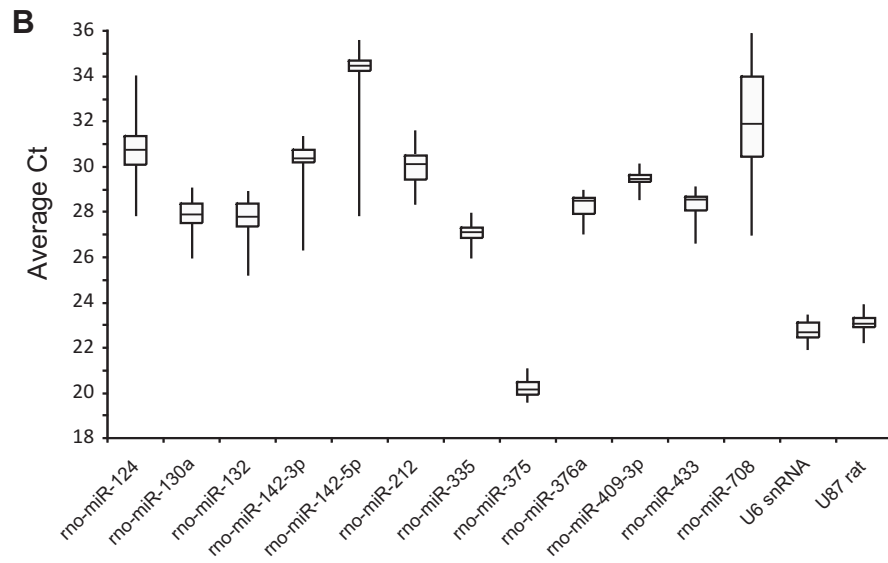

Supplement: pone.0018613.s002.pdf [file pone.0018613.s002.pdf]
